# Supplementary material for: Quantitative Proteomic Analysis of Diabetes Mellitus in Heart Failure With Preserved Ejection Fraction
Source: PubMed Central journal article supplement — JACC Basic Transl Sci. 2021 Feb 10;6(2):89–99. doi: 10.1016/j.jacbts.2020.11.011 (PMC7907637; doi:10.1016/j.jacbts.2020.11.011), 2021-02-10
Supplement: mmc1.pdf [file mmc1.pdf]

## Supplemental Material

Supplemental Table S1: Comparison of Demographic and Clinical Variables in Patients With and Without SomaScan® Performed at Baseline in TOPCAT.

| Variable                       | SomaScan Absent<br>(n=3224) | SomaScan Present<br>(n=218) | p Value |
|--------------------------------|-----------------------------|-----------------------------|---------|
| <b>Demographics</b>            |                             |                             |         |
| Diabetic                       | 1015 (31.5%)                | 103 (47.2%)                 | <0.001  |
| Age, years                     | 69.0 (61.0, 76.0)           | 72.0 (65.0, 79.0)           | <0.001  |
| Gender                         | 1546 (48.0%)                | 122 (56.0%)                 | 0.022   |
| Ethnicity                      |                             |                             | 0.21    |
| White                          | 2871 (89.1%)                | 188 (86.2%)                 |         |
| Black                          | 276 (8.6%)                  | 26 (11.9%)                  |         |
| Asian                          | 77 (2.4%)                   | 4 (1.8%)                    |         |
| <b>Medical History</b>         |                             |                             |         |
| Myocardial Infarction          | 844 (26.2%)                 | 49 (22.5%)                  | 0.23    |
| Stroke                         | 250 (7.8%)                  | 15 (6.9%)                   | 0.64    |
| CABG                           | 385 (11.9%)                 | 58 (26.6%)                  | <0.001  |
| PCI                            | 444 (13.8%)                 | 56 (25.7%)                  | <0.001  |
| COPD                           | 379 (11.8%)                 | 24 (11.0%)                  | 0.74    |
| HTN                            | 2940 (91.2%)                | 206 (94.5%)                 | 0.095   |
| Hyperlipidemia                 | 1904 (59.1%)                | 168 (77.1%)                 | <0.001  |
| Atrial Fibrillation            | 1105 (34.3%)                | 108 (49.5%)                 | <0.001  |
| Active Smoker                  | 347 (10.8%)                 | 13 (6.0%)                   | 0.025   |
| Former Smoker                  | 1140 (35.4%)                | 127 (58.3%)                 | <0.001  |
| <b>Medications</b>             |                             |                             |         |
| Beta Blocker                   | 2495 (77.4%)                | 181 (83.0%)                 | 0.054   |
| CCB                            | 1208 (37.5%)                | 85 (39.0%)                  | 0.66    |
| ACEi or ARB                    | 2735 (84.9%)                | 164 (75.2%)                 | <0.001  |
| Statin                         | 1644 (51.0%)                | 161 (73.9%)                 | <0.001  |
| Insulin                        | 384 (11.9%)                 | 43 (19.7%)                  | <0.001  |
| <b>Physical Exam and Labs</b>  |                             |                             |         |
| BMI, kg/m <sup>2</sup>         | 31 (27, 36)                 | 33 (28, 38)                 | <0.001  |
| Systolic Blood Pressure, mmHg  | 130 (120, 140)              | 124 (115, 135)              | <0.001  |
| Diastolic Blood Pressure, mmHg | 80 (70, 81)                 | 70 (62, 78)                 | <0.001  |
| GFR, ml/min                    | 66 (54, 79)                 | 63 (51, 76)                 | 0.054   |
| Hematocrit, %                  | 40 (37, 43)                 | 39 (36, 42)                 | <0.001  |
| BNP, pg/mL                     | 418 (179, 877)              | 478 (193, 1001)             | 0.11    |

Continuous data are presented as median (25th, 75th percentiles) and categorical data as count

(percentage). ACEi, angiotensin converting enzyme inhibitor; ARB, angiotensin receptor blocker; BMI,

body mass index; BNP, brain natriuretic peptide; CABG, coronary artery bypass graft; CCB, calcium

channel blocker; COPD, chronic obstructive pulmonary disease; GFR, glomerular filtration rate; PCI, percutaneous coronary intervention.
